# Supplementary material for: MiRNAs in Systemic Sclerosis Patients with Pulmonary Arterial Hypertension: Markers and Effectors
Source: MDPI journal article supplement (doi:10.3390/biomedicines10030629), 2022-03-08
Supplement: s1 [file s1]

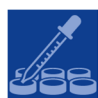

**Table S1.** GO biological annotations for genes common to the miR-let-7d targets and to the lists of genes of immune, endothelial and myofibroblast cells.

| miR-let-7d               | ID         | Name                                                    | Bonferroni            | Genes from Input | Genes in Annotation |
|--------------------------|------------|---------------------------------------------------------|-----------------------|------------------|---------------------|
| <b>Immune system</b>     |            |                                                         |                       |                  |                     |
| 1                        | GO:0032496 | response to lipopolysaccharide                          | $3.81 \times 10^{-7}$ | 6                | 368                 |
| 2                        | GO:0002237 | response to molecule of bacterial origin                | $5.32 \times 10^{-7}$ | 6                | 389                 |
| 3                        | GO:0033993 | response to lipid                                       | $9.54 \times 10^{-7}$ | 7                | 977                 |
| 4                        | GO:0071345 | cellular response to cytokine stimulus                  | $3.94 \times 10^{-6}$ | 7                | 1196                |
| 5                        | GO:0034097 | response to cytokine                                    | $6.71 \times 10^{-6}$ | 7                | 1290                |
| 6                        | GO:0051090 | regulation of DNA-binding transcription factor activity | $3.52 \times 10^{-5}$ | 6                | 782                 |
| 7                        | GO:0019221 | cytokine-mediated signaling pathway                     | $4.74 \times 10^{-5}$ | 6                | 822                 |
| 8                        | GO:0009617 | response to bacterium                                   | $5.06 \times 10^{-5}$ | 6                | 831                 |
| 9                        | GO:1901700 | response to oxygen-containing compound                  | $9.24 \times 10^{-5}$ | 7                | 1875                |
| 10                       | GO:0071887 | leukocyte apoptotic process                             | $1.01 \times 10^{-4}$ | 4                | 134                 |
| <b>Myofibroblasts</b>    |            |                                                         |                       |                  |                     |
| 1                        | GO:0072359 | circulatory system development                          | $6.01 \times 10^{-8}$ | 13               | 1340                |
| 2                        | GO:0009719 | response to endogenous stimulus                         | $9.97 \times 10^{-8}$ | 14               | 1780                |
| 3                        | GO:0050679 | positive regulation of epithelial cell proliferation    | $1.23 \times 10^{-7}$ | 8                | 245                 |
| 4                        | GO:0008284 | positive regulation of cell population proliferation    | $1.70 \times 10^{-7}$ | 12               | 1117                |
| 5                        | GO:0042127 | regulation of cell population proliferation             | $3.99 \times 10^{-7}$ | 14               | 1973                |
| 6                        | GO:0010165 | response to X-ray                                       | $4.68 \times 10^{-7}$ | 5                | 35                  |
| 7                        | GO:0071363 | cellular response to growth factor stimulus             | $2.25 \times 10^{-6}$ | 10               | 775                 |
| 8                        | GO:0070848 | response to growth factor                               | $3.25 \times 10^{-6}$ | 10               | 805                 |
| 9                        | GO:0034349 | glial cell apoptotic process                            | $4.38 \times 10^{-6}$ | 4                | 17                  |
| 10                       | GO:0051338 | regulation of transferase activity                      | $4.50 \times 10^{-6}$ | 11               | 1131                |
| <b>Endothelial cells</b> |            |                                                         |                       |                  |                     |
| 1                        | GO:0060548 | negative regulation of cell death                       | $4.44 \times 10^{-6}$ | 7                | 1214                |
| 2                        | GO:0070848 | response to growth factor                               | $4.24 \times 10^{-5}$ | 6                | 805                 |
| 3                        | GO:0051247 | positive regulation of protein metabolic process        | $4.78 \times 10^{-5}$ | 7                | 1704                |
| 4                        | GO:0032496 | response to lipopolysaccharide                          | $6.35 \times 10^{-5}$ | 5                | 368                 |
| 5                        | GO:0002237 | response to molecule of bacterial origin                | $8.37 \times 10^{-5}$ | 5                | 389                 |
| 6                        | GO:1901214 | regulation of neuron death                              | $1.04 \times 10^{-4}$ | 5                | 406                 |
| 7                        | GO:0010941 | regulation of cell death                                | $1.24 \times 10^{-4}$ | 7                | 1952                |
| 8                        | GO:0042127 | regulation of cell population proliferation             | $1.34 \times 10^{-4}$ | 7                | 1973                |
| 9                        | GO:0070997 | neuron death                                            | $1.69 \times 10^{-4}$ | 5                | 448                 |
| 10                       | GO:0071345 | cellular response to cytokine stimulus                  | $4.51 \times 10^{-4}$ | 6                | 1196                |

GO biological annotations of the 3 groups of genes found in Table 4. The annotations were divided into different categories that were marked by different colors. Explanations for the colors: Gray-response to bacteria, Yellow-response to cytokine, Blue-cell proliferation and response to growth factor, Violet-circulatory system and tube biology, Red-cell death.

**Table S2.** GO biological annotations for genes common to the miR-26 targets and to the lists of genes of immune, endothelial and myofibroblast cells.

| miR-26                   | ID         | Name                                                     | Bonferroni             | Genes from Input | Genes in Annotation |
|--------------------------|------------|----------------------------------------------------------|------------------------|------------------|---------------------|
| <b>Immune system</b>     |            |                                                          |                        |                  |                     |
| 1                        | GO:0071345 | cellular response to cytokine stimulus                   | $1.48 \times 10^{-5}$  | 7                | 1196                |
| 2                        | GO:0034097 | response to cytokine                                     | $2.50 \times 10^{-5}$  | 7                | 1290                |
| 3                        | GO:0019221 | cytokine-mediated signaling pathway                      | $9.4 \times 10^{-5}$   | 6                | 822                 |
| 4                        | GO:0002682 | regulation of immune system process                      | $2.05 \times 10^{-4}$  | 7                | 1747                |
| 5                        | GO:0002224 | toll-like receptor signaling pathway                     | $2.33 \times 10^{-4}$  | 4                | 166                 |
| 6                        | GO:0006952 | defense response                                         | $4.17 \times 10^{-4}$  | 7                | 1935                |
| 7                        | GO:0010647 | positive regulation of cell communication                | $4.43 \times 10^{-4}$  | 7                | 1952                |
| 8                        | GO:0023056 | positive regulation of signaling                         | $4.49 \times 10^{-4}$  | 7                | 1956                |
| 9                        | GO:1902533 | positive regulation of intracellular signal transduction | $5.93 \times 10^{-4}$  | 6                | 1129                |
| 10                       | GO:0002221 | pattern recognition receptor signaling pathway           | $7.33 \times 10^{-4}$  | 4                | 221                 |
| <b>Myofibroblasts</b>    |            |                                                          |                        |                  |                     |
| 1                        | GO:0007507 | heart development                                        | $4.02 \times 10^{-10}$ | 14               | 698                 |
| 2                        | GO:0072359 | circulatory system development                           | $1.06 \times 10^{-8}$  | 16               | 1340                |
| 3                        | GO:0009887 | animal organ morphogenesis                               | $1.14 \times 10^{-6}$  | 14               | 1263                |
| 4                        | GO:0001837 | epithelial to mesenchymal transition                     | $9.36 \times 10^{-6}$  | 7                | 169                 |
| 5                        | GO:0060429 | epithelium development                                   | $1.42 \times 10^{-5}$  | 14               | 1532                |
| 6                        | GO:0035295 | tube development                                         | $2.38 \times 10^{-5}$  | 13               | 1310                |
| 7                        | GO:0035239 | tube morphogenesis                                       | $2.78 \times 10^{-5}$  | 12               | 1068                |
| 8                        | GO:0009719 | response to endogenous stimulus                          | $9.70 \times 10^{-5}$  | 14               | 1780                |
| 9                        | GO:0071495 | cellular response to endogenous stimulus                 | $1.30 \times 10^{-4}$  | 13               | 1510                |
| 10                       | GO:0048762 | mesenchymal cell differentiation                         | $1.65 \times 10^{-4}$  | 7                | 256                 |
| <b>Endothelial cells</b> |            |                                                          |                        |                  |                     |
| 1                        | GO:2000145 | regulation of cell motility                              | $2.64 \times 10^{-4}$  | 6                | 1159                |
| 2                        | GO:0040012 | regulation of locomotion                                 | $3.41 \times 10^{-4}$  | 6                | 1210                |
| 3                        | GO:0051270 | regulation of cellular component movement                | $4.14 \times 10^{-4}$  | 6                | 1250                |
| 4                        | GO:0042060 | wound healing                                            | $4.87 \times 10^{-4}$  | 5                | 594                 |
| 5                        | GO:0050731 | positive regulation of peptidyl-tyrosine phosphorylation | $5.17 \times 10^{-4}$  | 4                | 219                 |
| 6                        | GO:0030335 | positive regulation of cell migration                    | $6.68 \times 10^{-4}$  | 5                | 633                 |
| 7                        | GO:2000147 | positive regulation of cell motility                     | $8.34 \times 10^{-4}$  | 5                | 662                 |
| 8                        | GO:0040017 | positive regulation of locomotion                        | $9.39 \times 10^{-4}$  | 5                | 678                 |
| 9                        | GO:0051272 | positive regulation of cellular component movement       | $9.6 \times 10^{-4}$   | 5                | 681                 |
| 10                       | GO:0060429 | epithelium development                                   | $1.39 \times 10^{-4}$  | 6                | 1532                |

GO biological annotations of the 3 groups of genes found in Table 5. The annotations were divided into different categories that were marked by different colors. Explanations for the colors: Yellow-response to cytokine, Violet-circulatory system and tube biology, Green-mesenchymal differentiation and cell migration.
